# Supplementary material for: Molecular detection and identification of Leishmania DNA and blood meal analysis in Phlebotomus (Larroussius) species
Source: PubMed Central journal article supplement (PMC7098558; doi:10.1371/journal.pntd.0008077), 2020-03-26
Supplement: pntd.0008077.s001.pdf [file pntd.0008077.s001.pdf]

10 20 30 40 50 60 70  
 KP691596 GGA GGCTTATTCTATATATATATATAG --TATAG GCTT TTCC CACATACACAGCAAACTTTTAT  
 MK463629 GGA GGCTTATTCTATATATATATATAG --TATAG GCTT TTCC CACATACACAGCAAACTTTTAT  
 MK463628 GGAAGGCTTATTCTATATATATATATAG --TATAGC GCTT TTCC CACATACACAGCACACTTTTGT  
 MK463621 GGAAGGCTTATTCTATATATATATATAG --TATAGC GCTT TTCC CACATACACAGCACACTTTTAT  
 MK463622 GGGAGGCTTATTCTATATATATATATAG --TATAGC GCTT TTCC CACATACACAGCACACTTTTAT  
 MK463627 AGGAGGCTTATTCTATATATATATATAG --TATAGC GCTT TTCC CACATACACAGCACACTTTTAT  
 MK463625 AGGAGGCTTATTCTATATATATATATAG --TATAGC GCTT TTCC CACATACACAGCACACTTTTAT  
 MK463623 GGGAGGCTTATTCTATATATATATATAG --TATGG GCTT TTCC CACATACACAGCACACTTTTAT  
 MK463626 GAGAGCCTAAACTTCTATATATATATATCCGTATAGC GCTTATTCC CACATACACAGCACACTTTTAT  
 MK463624 GGGAGAGCTATTTTCTATATATATATAGCCTT TCCC GCTT TTCC CACATACACATCAAATTTTTAT  
 MK474651 GGGAGGCCTA --TATATAT TATACATT ATATAG GCCTTTCCCACACATACACAGCAAACTTTTGT  
 MK474649 GGGAGGCCTA --TATATAT TATACATT ATATAGA GCCTTTCCCACACATACACAGCAAACTTTTGT  
 MK474648 GGAAGGCCTA --TATATATATATACATT ATATAGG GCCTTTCCCACACATACACAGCAAACTTTTGT  
 MK474646 AGAAGGCCTA --TATATAT TATACAGT ATATAC GCCTTTCCCCACACATACACAGCAAACTTTTGT  
 MK474647 GGGAGGCCTA --TATATAT TATACATT ATATAG GCCTTTCCCACACATACACAGCAAACTTTTGT  
 KY963132 GGGAGGCCTA --TATATAT TATACATT ATATAG GCCTTTCCCACACATACACAGCAAACTTTTGT  
 MK474650 GGGAGGCCTA --TATATAT TATACATT ATATAG GCCTTTCCCACACATACACAGCAAACTTTTGT  
 MK474652 AGGATGCCTA --TATATAT TATACGTT TTACCG GCTTTTTCCCCCCTTACCGTCAACCTTTTTT  
 MK474653 AGGAAGCCTA --TATATAT TATACATT TTATATAGGCCTTTCCCACACATACACAGCAAACTTTTGT  
 MK474642 GGGGAGACTA --TGTATATATATGTAG --- GCCTTTCCC ACATACACAGCAAAGTTTTGT  
 MK474641 AAGGAGACTA --TGTATATATATGTAG --- GCCTTTCCC ACATACACAGCAAAGTTTTGT  
 MG980399 GGGAGACCTA --TGTATATATATGTAG --- GCCTTTCCC ACATACACAGCAAAGTTTTGT  
 MK474640 AGAAGACCTAA --TGTATATATATGTAG --- GCCTTTCCC ACATACACAGCAAAGTTTTGT  
 JX898938 TAGAGAGTAGTAGAAATACATCTACTCGGGAGGCAT --GTTTTTTCC ---GATATGCCTTTCCCACAT

80 90 100 110 120 130 140  
 KP691596 ACTCGAAATTTGCAGTAAA --- AAAGGCCGATCGACGTTGTAGAACGCACCGCCTATAC --ACAAAAG  
 MK463629 ACTCGAAATTTGCAGTAAA --- AAAGGCCGATCGACGTTGTAGAACGCACCGCCTATAC --ACAAAAG  
 MK463628 ACTCGAAATTTGCAGTAAA --- AAAGGCCGATCGACGTTGTAGAACGCACCGCCTATAC --ACAAAAG  
 MK463621 ACTCGAAATTTGCAGTAAA --- AAAGGCCGATCGACGTTGTAGAACGCACCGCCTATAC --ACAAAAG  
 MK463622 ACTCGAAATTTGCAGTAAA --- AAAGGCCGATCGACGTTGTAGAACGCACCGCCTATAC --ACAAAAG  
 MK463627 ACTCGAAATTTGCAGTAAA --- AAAGGCCGATCGACGTTGTAGAACGCACCGCCTATAC --ACAAAAG  
 MK463625 ACTCGAAATTTGCAGTAAA --- AAAGGCCGATCGACGTTGTAGAACGCACCGCCTATAC --ACAAAAG  
 MK463623 ACTCGATATTTGCAGTAAA --- AAAGGCCGATCGACGTTGTAGAACGCACCGCCTATAC --ACAAAAG  
 MK463626 ACTCGATATTTGCAGTAAA --- AAAGGCCGATCGACGTTGTAGAACGCACCGCCTATAC --ACAAAAG  
 MK463624 TCTCAATATTTGCAGTAAA --- AAGGCCGATCGACGTTGTAGAACGCACCGCCCATAC --ACAAAAG  
 MK474651 ACTCGAAGTTTGCAGTAAACA --- AAAGCCGATCGACGTTATA --ACGCACCGCCTATAC --ACAAAAG  
 MK474649 ACTCGAAGTTTGCAGTAAACA --- AAAGGCCGATCGACGTTATA --ACGCACCGCCTATAC --ACAAAAG  
 MK474648 ACTCGAAGTTTGCAGTAAACA --- AAAGGCCGATCGACGTTATA --ACGCACCGCCTATAC --ACAAAAG  
 MK474646 ACTCTAAGTTTGCAGTAAACA --- AAAGGCCATTCGACGTTATA --ACGCACCGCCTATAC --ACAAAAT  
 MK474647 ACTCGAAGTTTGCAGTAAACA --- AAAGGCCGATCGACGTTATA --ACGCACCGCCTATAC --ACAAAAG  
 KY963132 ACTCGAAGTTTGCAGTAAACA --- AAAGGCCGATCGACGTTATA --ACGCACCGCCTATAC --ACAAAAG  
 MK474650 ACTCGAAGTTTGCAGTAAACA --- AAAGGCCGATCGACGTTATA --ACGCACCGCCTATAC --ACAAAAG  
 MK474652 ACTCAAAATTTGCCTAACA --- AAAGGCCAACCCACCTTATA --ACCCACCGCCTTTCC --ACAAAAT  
 MK474653 ACTCGAAGTTTGCAGTAAACA --- AAAGGCCAATCAACGTTATA --ACCCACCCCCAATAC --ACAAAAC  
 MK474642 ACTCAAAATTTGCAGTAAAAA --- AAAGGCCGATCGACGTTATA --ACGCACCGCCTAT --ACAAAAG  
 MK474641 ACTCAAAATTTGCAGTAAAAA --- AAAGGCCGATCGACGTTATA --ACGCACCGCCTAT --ACAAAAG  
 MG980399 ACTCAAAATTTGCAGTAAAAA --- AAAGGCCGATCGACGTTATA --ACGCACCGCCTAT --ACAAAAG  
 MK474640 ACTCAAAATTTGCAGTAAAAA --- AAAGGCCGATCGACGTTATA --ACGCACCGCCTAT --ACAAAAG  
 JX898938 ACACAAACACAGCAATATATATGTATATATATACGTATATTGCTATACCCAAAAACCATACCGTAAAAAG

150 160 170 180 190 200 210  
 KP691596 CAAAAATGTCGGTTTATACAAAA --- AAATAGACGGCGTTTCGGTT --TTTGGCGGGAGGGAGAGAG  
 MK463629 CAAAAATGTCGGTTTATACAAAA --- AAATAGACGGCGTTTCGGTT --TTTGGCGGGAGGGAGAGAG  
 MK463628 CAAAAATGTCGGTTTATACAAAA --- AAATAGACGGCGTTTCGGTT --TTTGGCGGGAGGGAGAGAG  
 MK463621 CAAAAATGTCGGTTTATACAAAA --- AAATAGACGGCGTTTCGGTT --TTTGGCGGGAGGGAGAGAG  
 MK463622 CAAAAATGTCGGTTTATACAAAA --- AAATAGACGGCGTTTCGGTT --TTTGGCGGGAGGGAGAGAG  
 MK463627 CAAAAATGTCGGTTTATACAAAA --- AAATAGACGGCGTTTCGGTT --TTTGGCGGGAGGGAGAGAG

MK463625 CAAAAATGTCGGTTTATACAAA ---- AAATAGACGGCGTTTCGGTT - TTTGGCGGGAGGGAGAGAG  
 MK463623 CAAAAATGTCGGTTTATACAAA ---- AAATAGACGGCGTTTCGGTT - TTTGGCGGGGGGGAGAGAG  
 MK463626 CAAAAATGTCGGTTTATACAAA ---- ATATAGACTGCGTTTCGGTT - TTTGGCGGGAGGGAGAGAG  
 MK463624 CAAAAATTGTCGGTTTATACAAA ---- ATATAGACTGTTTCGGTT - TTTGGCGGGGGGGAGAGAG  
 MK474651 CAAAAATGTCGGTTTATACAAA ---- TATACGGCGTTTCGGTT - TT ----- GTTGG  
 MK474649 CAAAAATGTCGGTTTATACAAA ---- TATACAGCGTTTCGGTT - TT ----- GTTGG  
 MK474648 CAAAAATGTCGGTTTATACAAA ---- TATACTGCTTTTCGGTT - TT ----- GTTGG  
 MK474646 CTAAAAATGTCGGTTTATACAAA ---- TATACTGCTTTTCGGTT - TT ----- GGTGG  
 MK474647 CAAAAATGTCGGTTTATACAAA ---- TATACGGCGTTTCGGTT - TT ----- GTTGG  
 KY963132 CAAAAATGTCGGTTTATACAAA ---- TATACGGCGTTTCGGTT - TT ----- GTTGG  
 MK474650 CAAACATGTCGGTTTATACAAA ---- TATACGGCGTTTCGGTT - TT ----- GTTGG  
 MK474652 CAAACATGTCCTTTTATACAAAT ---- TATACGGCTTTCCGGTT - TT ----- GTTGG  
 MK474653 CAAACATGTCGGTTTATACAAA ---- TATACGGCGTTTCGGTT - TT ----- GTTGG  
 MK474642 CAAAAATGTCGGTTTATACAAA ---- A ATATACGGCGTTTCGGTT - TT ----- TGG  
 MK474641 CAAAAATGTCGGTTTATACAAA ---- A ATATACGGCGTTTCGGTT - TT ----- TGG  
 MG980399 CAAAAATGTCGGTTTATACAAA ---- A ATATACGGCGTTTCGGTT - TT ----- TGG  
 MK474640 CAAAAATGTCGGTTTATACAAA ---- A ATATACGGCGTTTCAGTT - TT ----- TGG  
 JX898938 CAAAAAGGCCGGTCGACGCCAAATGCCGCGGTATACAGTGGAAAAGTCCGTTTCGTTACGGCTCTTTCTC

220 230 240 250

KP691596 . . . . | . . . . | . . . . | . . . . | . . . . | . . . . | . . . . | . . . . | . . . . | . . . . | . . . .  
 AGGGGGGTGCGTGC CGGT GGATAACGGCTCA - CATAA - CGTGTCCG  
 MK463629 AGGGGGGTGCGTGC CGGT GGATAACGGCTCA - CAT -----  
 MK463628 AGGGGGGTGCGTGC CGGT GGATAACGGCTCA - CATAAACGTGTCAGC  
 MK463621 AGGGGGGTGCGTGC CGGT GGATAACGGCTCA - ATAAACGTGTCACA  
 MK463622 AGGGGGGTGCGTGC CGGT GGATAACGGCTCA - ATAAACGTGTCACA  
 MK463627 AGGGGGGTGCGTGC CGGT GGATAACGGCTCA - CATAAACGTGTCACA  
 MK463625 AGGGGGGTGCGTGC CGGT GGATAACGGCTCA - CATAACGTGTCACA  
 MK463623 AGGGGGGTGCGTGC CGGT GGATAACGGCTCA - ATAA - CGTGTCCG  
 MK463626 AGGGGGGGGGCGTGC CGGTAGGATAACGGCTCACATAAACGGTGTCCG  
 MK463624 AGGGGGGG - CGTGC - - - - - ATAACGGCTCA - - - - - AAGCATGTCACA  
 MK474651 CGGGGGGTGCGTGTGTGT GGATAACGGCTCA - CATAAACGTGTCGCA  
 MK474649 CGGGGGGTGCGTGTGTGT GGATAACGGCTCA - ATAAACGTGTCACA  
 MK474648 CGGGGGGTGCATGTGTGT GGATAACGGCTCA - CATAAACGTGTCGCA  
 MK474646 CGGGGGGTGCATGTGTGT GGACGCA -----  
 MK474647 CGGGGGGTGCGTGTGTGT GGATAACGGCTCA - CATAA - CGTGTCCG  
 KY963132 CGGGGGGTGCGTGTGTGT GGATAACGGCTCA - CATAA - CGTGTCCG  
 MK474650 TGGGGGGTGCATGTTGT GGATAACGGCTCA - CATAA - CGTGTCCG  
 MK474652 TGGGGGGAGCATGGTGT - GAATAACGGCTCC - AATAA - CGTGCCAA  
 MK474653 GGGGGGTGCGTGTGTGT GGATAACGGCTCA - TTAAAC -----  
 MK474642 CGGGGTGGGTGCGTGTGT GGATAACGGCTCA - CATAA - CGTGTCCG  
 MK474641 CGGGGTGGGTGCGTGTGT GGATAACGGCTCA - CATAA - CGTGTCCG  
 MG980399 CGGGGTGGGTGCGTGTGT GGATAACGGCTCA - CATAA - CGTGTCCG  
 MK474640 CGGGGTGGGTGCGTGTGT GGATAACGGCTCACATAAACGTGTCGCA  
 JX898938 TCTCGCGGGTGTGTGTGT GGATAACGGCTCA - CATAA - CGTGTCCG
